1

May 27, 2020

2

3

## **SARS-CoV-2 envelope protein topology in**

4

## **eukaryotic membranes**

5

6 Gerard Duart #, M<sup>a</sup> Jesús García-Murria #, Brayan Grau #, José M. Acosta-Cáceres,

7

Luis Martínez-Gil \*, and Ismael Mingarro \*

8

9 Departament de Bioquímica i Biologia Molecular, Estructura de Recerca

10 Interdisciplinar en Biotecnologia i Biomedicina (ERI BioTecMed), Universitat de

11 València. E-46100 Burjassot, Spain.

12

13

14

15 # Equal contribution (alphabetical order)

16 \* Corresponding authors

17

18 **ABSTRACT**

19 Coronavirus E protein is a small membrane protein found in the virus envelope.  
20 Different coronavirus E proteins share striking biochemical and functional  
21 similarities, but sequence conservation is limited. In this report, we studied the E  
22 protein topology from the new SARS-CoV-2 virus both in microsomal membranes  
23 and in mammalian cells. Experimental data reveal that E protein is a single-spanning  
24 membrane protein with the N-terminus being translocated across the membrane,  
25 while the C-terminus is exposed to the cytoplasmic side (N<sub>lum</sub>/C<sub>cyt</sub>). The defined  
26 membrane protein topology of SARS-CoV-2 E protein may provide a useful  
27 framework to understand its interaction with other viral and host components and  
28 establish the basis to tackle the pathogenesis of SARS-CoV-2.

29

30 **KEYWORDS**

31 Coronavirus; Envelope protein; membrane insertion; SARS-CoV-2; topology;

## 32 INTRODUCTION

33 The coronavirus disease 19 (COVID-19), an extremely infectious human disease  
34 caused by coronavirus SARS-CoV-2, has spread around the world at an  
35 unprecedented rate, causing a worldwide pandemic. While the number of confirmed  
36 cases continues to grow rapidly, the molecular mechanisms behind the biogenesis  
37 of viral proteins are not fully unraveled. The SARS-CoV-2 genome encodes for up  
38 to 29 proteins, although some may not get expressed [1]. The viral RNA is packaged  
39 by the structural proteins to assemble viral particles at the ERGIC (ER-Golgi  
40 intermediate compartment). The four major structural proteins are the spike (S)  
41 surface glycoprotein, the membrane (M) matrix protein, the nucleocapsid (N) protein,  
42 and the envelope (E) protein. These conserved structural proteins are synthesized  
43 from sub-genomic RNAs (sgRNA) encoded close to the 3' end of the viral genome  
44 [2].

45 Among the four major structural proteins, the E protein is the smallest and  
46 has the lowest copy number of the membrane proteins found in the lipid envelope of  
47 mature virus particles (reviewed [3,4]). However, it is critical for pathogenesis of other  
48 human coronaviruses [5,6]. Interestingly, the sgRNA encoding E protein is one of the  
49 most abundantly expressed transcripts despite the protein being low copy number  
50 in mature viruses [1]. It encodes a 75 residues long polypeptide with a predicted  
51 molecular weight of ~8 kDa. Two aliphatic amino acids (Leu and Val) constitute a  
52 substantial portion (36%, 27/75) of the E protein, which accounts for the high grand  
53 average of hydrophobicity (GRAVY) index of the protein (1.128), as calculated using  
54 the ExPASy ProtParam tool (<https://web.expasy.org/protparam/>). Comparative  
55 sequence analysis of the E protein of SARS-CoV-2 and the other six known human  
56 coronaviruses, do not reveal any large homologous/identical regions (Figure 1), with

57 only the initial methionine, Leu39, Cys40 and, Pro54 being ubiquitously conserved.  
58 With regard to overall sequence similarity SARS-CoV-2 E protein has the highest  
59 similarity to SARS-CoV (94.74%) with only minor differences (Figure 1B), and the  
60 lowest with HCOV-NL63 (18.46%). These findings are consistent with the  
61 phylogenetic tree proposed based on the amino acid sequences of the human  
62 coronavirus E proteins using ClustalW (Figure 1C).

63

## 64 **RESULTS AND DISCUSSION**

65 Computer-assisted analysis of the SARS-CoV-2 E protein amino acid sequence  
66 using seven popular prediction methods showed that all membrane protein  
67 prediction algorithms except MEMSAT-SVM suggested the presence of one  
68 transmembrane (TM) segment located roughly around amino acids 12 to 39 (Table  
69 1), which is not predicted as a cleavable signal sequence according to SignalP-5.0  
70 [7]. Regarding E protein topology, TMHMM and Phobius predicted an N-terminus  
71 cytosolic orientation, whilst MEMSAT-SVM, TMPred, HMMTop and TOPCONS  
72 predicted an N-terminus luminal orientation. Firstly, we performed *in vitro* E protein  
73 transcription/translation experiments in the presence of ER-derived microsomes and  
74 [<sup>35</sup>S]-labeled amino acids. The membrane insertion orientation of the predicted TM  
75 segment into microsomal membranes was based on N-linked glycosylation and  
76 summarized in Figure 2 (top).

77 N-linked glycosylation has been extensively used as topological reporter for  
78 more than two decades [8]. In eukaryotic cells, proteins can only be glycosylated in  
79 the lumen of the ER because the active site of oligosaccharyl transferase, a  
80 translocon-associated protein responsible for N glycosylation [9], is located there  
81 [10]; no N-linked glycosylation occurs within the membrane or in the cytosol. It is

82 important to note that two possible N-linked glycosylation sites are located C-  
83 terminally of the predicted TM segment in E protein wild-type sequence at positions  
84 N48 and N66 (Figure 1). However, N48 is not expected to be modified even if  
85 situated lumenally due to the close proximity of this glycosylation acceptor site to the  
86 membrane if the hydrophobic region is recognized as TM by the translocon [11,12].  
87 Thus, mono-glycosylation (at N66) would serve as a C-terminal translocation  
88 reporter. To test N-terminal translocation a construct was engineered where a  
89 predicted highly efficient glycosylation acceptor site (NST) was designed at the N-  
90 terminus. When E protein constructs were translated *in vitro* in the presence of  
91 microsomes the protein was significantly glycosylated when the N-terminal designed  
92 glycosylation site was present, as shown by the increase in the electrophoretic  
93 mobility of the slower radioactive band after an endoglycosidase H (Endo H)  
94 treatment (Figure 2, lanes 1 and 2). However, when a control (QST) that is not a  
95 glycosylation acceptor site (lane 3) or the wild-type (lane 4) sequences were  
96 translated, E protein molecules were minimally glycosylated. Since multiple  
97 topologies have been reported for previous coronavirus E proteins [13-17], SARS-  
98 CoV-2 E protein insertion into the microsomal membranes in two opposite  
99 orientations cannot be discarded, but being dominant an N<sub>lum</sub>/C<sub>cyt</sub> orientation.

100 To analyse protein topology in mammalian cells, a series of E protein variants  
101 tagged with c-myc epitope at the C-terminus were transfected into HEK-293T cells.  
102 As shown in Figure 3A, only an E protein construct harbouring the N-terminal  
103 engineered acceptor site was efficiently modified (lanes 1-4), denoting an N-terminal  
104 ER luminal localisation (N<sub>lum</sub>). Several topological parameters have been proposed  
105 to govern membrane protein topology, among them the preferential distribution of  
106 positively charged residues in the cytosol ('positive-inside rule') has been

107 established as the primary topology determinant both experimentally [18] and  
108 statistically [19]. E protein is a single-spanning membrane protein with an even net  
109 charge distribution on both sides of the membrane. There are only eight charged  
110 residues along the protein sequence, two negatively charged residues preceding the  
111 TM segment and five positively and one negatively charged residues at the C-  
112 terminal domain (Fig. 1A), that nicely correlates the observed topology with the  
113 'positive-inside rule'. However, negatively charged residues have also been proved  
114 to significantly affect the topology [20]. To test the robustness of the observed  
115 topology, we added an optimized Ct glycosylation tag [21] and replaced the two  
116 negatively charged residues located in the translocated N-terminal domain (E7 and  
117 E8) by two lysine residues (Fig. 3B). In cells expressing this mutant E protein  
118 (EE>KK), the protein retained its C-terminal tail at the cytosolic side of the membrane  
119 as indicated by the absence of glycosylated forms (Fig. 3B, lanes 3 and 4). These  
120 data reveal that topological determinants have only a minor effect on viral membrane  
121 protein topology as previously demonstrated for other viruses [22], and suggest that  
122 viral membrane protein topology could have co-evolved with the protein environment  
123 of its natural host, ensuring proper membrane protein orientation. Altogether, the  
124 present *in vivo* results demonstrated that SARS-CoV-2 E protein is a single-spanning  
125 membrane protein with an N<sub>lum</sub>/C<sub>cyt</sub> orientation in mammalian cell membranes.  
126 Similarly, SARS-CoV E protein was shown to mainly adopt an N<sub>lum</sub>/C<sub>cyt</sub> topology in  
127 infected and transiently expressing mammalian cells [23]. This topology is  
128 compatible with the ion channel capacity described previously [24], and with the  
129 recently published pentameric structural model of SARS-CoV E protein in micelles  
130 [25], in which the C-terminal tail of the protein is  $\alpha$ -helical and extramembrane.

131 The membrane topology described here, would allow the cytoplasmic C-  
132 terminal tail of the E protein to interact with the C-termini of M and/or S SARS-CoV-  
133 2 membrane embedded proteins [3], and/or with Golgi scaffold proteins as previously  
134 described for other coronaviruses [26], to induce virus budding or influence vesicular  
135 traffic through the Golgi complex by collecting viral membrane proteins for assembly  
136 at Golgi membranes. Future experiments will have to unravel whether these  
137 functions involve the SARS-CoV-2 E-protein.

138

## 139 **EXPERIMENTAL METHODS**

140 **Enzymes and chemicals.** TNT T7 Quick for PCR DNA was from Promega  
141 (Madison, WI, USA). Dog pancreas ER rough microsomes were from tRNA Probes  
142 (College Station, TX, USA). EasyTag™ EXPRESS<sub>35S</sub> Protein Labeling Mix, [<sup>35</sup>S]-L-  
143 methionine and [<sup>35</sup>S]-L-cysteine, for *in vitro* labeling was purchased from Perkin  
144 Elmer (Waltham, MA, USA). Restriction enzymes were from New England Biolabs  
145 (Massachusetts, USA) and endoglycosidase H was from Roche Molecular  
146 Biochemicals (Basel, Switzerland). PCR and plasmid purification kits were from  
147 Thermo Fisher Scientific (Ulm, Germany). All oligonucleotides were purchased from  
148 Macrogen (Seoul, South Korea).

149 **Computer-assisted analysis of E protein sequence.** Prediction of transmembrane  
150 segments was done using up to 7 of the most common methods available on the  
151 Internet:  $\Delta G$  Predictor [27,28] (<http://dgpred.cbr.su.se/>), TMHMM [29]  
152 (<http://www.cbs.dtu.dk/services/TMHMM/>), MEMSAT-SVM [30]  
153 (<http://bioinf.cs.ucl.ac.uk/psipred/>), TMpred (<https://embnet.vital->  
154 [it.ch/software/TMPRED\\_form.html](http://www.enzim.hu/hmmtop/)), HMMTop [31] (<http://www.enzim.hu/hmmtop/>),

155 Phobius [32] (<http://phobius.sbc.su.se/>) and TOPCONS [33] (<http://topcons.net/>). All  
156 user-adjustable parameters were left at their default values.

157 **DNA Manipulation.** Full-length E protein was synthesized by Invitrogen (*GeneArt*  
158 gene synthesis) and subcloned into *KpnI* linearized pCAGGS using In-Fusion HD  
159 cloning Kit (Takara) according to the manufacturer's instructions. For *in vitro* assays,  
160 DNA was amplified by PCR adding the T7 promoter and the relevant glycosylation  
161 sites during the process. N-terminal NST glycosylation site was designed by  
162 inserting an asparagine and a threonine before and after Ser3, respectively. Control  
163 no-glycosylable QST site was introduced in similarly inserting a glutamine residue  
164 instead of an asparagine. All E protein variants were obtained by site-directed  
165 mutagenesis using QuikChange kit (Stratagene, La Jolla, California) and were  
166 confirmed by sequencing the plasmid DNA at Macrogen Company (Seoul, South  
167 Korea)

168 **Translocon-mediated insertion into microsomal membranes.** E protein variants,  
169 PCR amplified from pCAGGS, were transcribed and translated using the TNT T7  
170 Quick for PCR DNA Coupled Transcription/Translation System (Promega, USA).  
171 The reactions contained 10  $\mu$ L of TNT, 2  $\mu$ L of PCR product, 1  $\mu$ L of EasyTag (5  
172  $\mu$ Ci), and 0.6  $\mu$ L of column-washed microsomes (tRNA Probes, USA) and were  
173 incubated for 60 min at 30 °C. Translation products were ultracentrifuged (100,000  
174 *g* for 15 min) on a 0.5 M sucrose cushion, and analyzed by SDS-PAGE. For the  
175 endoglycosidase H (Endo H) the treatment was done as previously described [34].  
176 Briefly, the translation mixture was diluted in 120  $\mu$ L of PBS and centrifuged on a 0.5  
177 M sucrose cushion (100 000  $\times$  *g* 15 min 4 °C). The pellet was then suspended in 50  
178  $\mu$ L of sodium citrate buffer with 0.5% SDS and 1%  $\beta$ -mercaptoethanol, boiled 5 min,



179 and incubated 1 h at 37 °C with 1 unit of Endo H. Then, the samples were analyzed  
180 by SDS-PAGE.

181 **E protein expression in mammalian cells.** E protein sequence variants were  
182 tagged with an optimized C-terminal glycosylation site [21,35] plus a c-myc epitope  
183 at their C-terminus and inserted in a pCAGGS-ampicillin plasmid. Once the  
184 sequence was verified, plasmids were transfected into HEK293-T cells using  
185 Lipofectamine 2000 (Life Technologies) according to the manufacturer's protocol.  
186 Approximately 24 h post-transfection cells were harvested and washed with PBS  
187 buffer. After a short centrifugation (1000 rpm for 5 min on a table-top centrifuge) cells  
188 were lysed by adding 100 µL of lysis buffer (30 mM Tris-HCl, 150 mM NaCl, 0.5%  
189 Nonidet P-40) were sonicated in an ice bath in a bioruptor (Diagenode) during 10min  
190 and centrifugated. Total protein was quantified and equal amounts of protein  
191 submitted to Endo H treatment or mock-treated, followed by SDS-PAGE analysis  
192 and transferred into a PVDF transfer membrane (ThermoFisher Scientific). Protein  
193 glycosylation status was analysed by Western Blot using an anti-c-myc antibody  
194 (Sigma), anti-rabbit IgG-peroxidase conjugated (Sigma), and with ECL developing  
195 reagent (GE Healthcare). Chemiluminescence was visualized using an  
196 ImageQuant™ LAS 4000mini Biomolecular Imager (GE Healthcare).

197

## 198 **Acknowledgments**

199 We thank Prof. Paul Whitley (University of Bath) for critical reading of the manuscript.  
200 This work was supported by grants PROMETEU/2019/065 from Generalitat  
201 Valenciana and COV20/01265 from ISCIII (to I.M.). G.D. was recipient of a  
202 predoctoral contract from the Spanish Ministry of Education (FPU). J.A.-C. was  
203 recipient of a predoctoral fellowship from the Ministerio de Educación (Perú). B.G.

204 was recipient of a predoctoral contract from the University of Valencia (Atracció de  
205 Talent).

206 **Table 1.** Computer analysis of the SARS-CoV-2 E protein amino acid sequence  
207 topology  
208

| Algorithm            | Nt      | Ct      | TMDs (start-end)  |
|----------------------|---------|---------|-------------------|
| $\Delta$ G Predictor | n.p.    | n.p.    | 1 (17-39)         |
| TMHMM                | cytosol | lumen   | 1 (12-34)         |
| MEMSAT-SVM           | lumen   | lumen   | 2 (10-39) (43-58) |
| TMpred               | lumen   | cytosol | 1 (17-34)         |
| HMMTop               | lumen   | cytosol | 1 (11-35)         |
| Phobius              | cytosol | lumen   | 1 (12-37)         |
| TOPCONS              | lumen   | cytosol | 1 (16-36)         |

209 n.p., non-predicted  
210

211

## 212 **Figure legend**

213 **Figure 1.** (A) Multi-alignment of amino acid sequences of the E protein of SARS-  
214 CoV-2 and the other six human coronavirus. SARS-CoV severe acute respiratory  
215 syndrome coronavirus (UniProt P59637), MERS-CoV Middle East respiratory  
216 syndrome coronavirus (UniProt K9N5R3), HCoV-HKU1 (UniProt Q0ZJ83), HCoV-  
217 OC43 (UniProt Q4VID3), HCoV-229E (UniProt P19741), HCoV-NL63 (UniProt  
218 Q5SBN7). Predicted TM segments at UniProt are highlighted in a grey box. Native  
219 predicted glycosylation acceptor sites in SARS-CoV-2 are shown in bold and  
220 charged residues highlighted with + or – symbols on top. Conserved residues are  
221 shown in orange. Differences between SARS-CoV-2 and SARS-CoV are highlighted  
222 as yellow boxes. (B) Phylogenetic data and (C) tree obtained with Clustal Omega  
223 (EMBL-EBI) using the default parameters.

224 **Figure 2.** Translocon-mediated insertion of E protein variants into microsomal  
225 membranes. (Top) Schematic representation of E protein constructs. (Bottom) *In*  
226 *vitro* translation in the presence of microsomes of the different E protein constructs.  
227 Construct containing inserted asparagine and threonine residues at positions 3 and  
228 5 (NST; lanes 1-2) or glutamine and threonine at positions 3 and 5 (lane 3), and wild-  
229 type variants (lane 4) were translated in the presence of microsomes. NST variant  
230 was split and half of the sample was Endo H treated (lane 1). Bands of non-  
231 glycosylated and glycosylated proteins are indicated by white and black dots,  
232 respectively. The gel is representative of at least four independent experiments.

233 **Figure 3.** E protein topology in mammalian cells. To determine the topology *in vivo*  
234 HEK-293T cells were transfected with C-terminal tagged (c-myc) E protein variants.  
235 (A) Constructs encoding wild-type (Wt; lanes 1 and 2), inserted asparagine and  
236 threonine at positions 3 and 5 (NST; lanes 3 and 4) or glutamine and threonine at  
237 positions 3 and 5 (QST; lanes 5 and 6) were Endo H (+) or mock (-) treated. Filled  
238 and empty Y-shaped symbols denoted acceptor (NST) and non-acceptor (QST)  
239 glycosylation sites, respectively. (B) Additionally, we included constructs containing  
240 similar Wt (lanes 1 and 2), replaced glutamic acids at positions 7 and 8 by lysine  
241 residues (EE>KK; lanes 3 and 4) or NST (lanes 5 and 6) variants with an extra  
242 glycosylation site inserted at the Ct end of the protein. Once again, to confirm the  
243 glycosylated nature of the higher molecular weight bands, samples were either Endo  
244 H (+) or mock (-) treated. Designed glycosylation sites and tags are shown in black,  
245 while native E protein features are shown in gray.

246

## 247 **References**

248

- 249 [1] D. Kim, J.-Y. Lee, J.-S. Yang, J.W. Kim, V.N. Kim, H. Chang, The  
250 Architecture of SARS-CoV-2 Transcriptome, *Cell*. (2020) 1–19.  
251 doi:10.1016/j.cell.2020.04.011.
- 252 [2] A. Wu, Y. Peng, B. Huang, X. Ding, X. Wang, P. Niu, et al., Genome  
253 Composition and Divergence of the Novel Coronavirus (2019-nCoV)  
254 Originating in China, *Cell Host and Microbe*. 27 (2020) 325–328.  
255 doi:10.1016/j.chom.2020.02.001.
- 256 [3] D. Schoeman, B.C. Fielding, Coronavirus envelope protein: current  
257 knowledge, (2019) 1–22. doi:10.1186/s12985-019-1182-0.
- 258 [4] T.R. Ruch, C.E. Machamer, The Coronavirus E Protein: Assembly and  
259 Beyond, *Viruses*. 4 (2012) 363–382. doi:10.3390/v4030363.
- 260 [5] F. Almazán, M.L. DeDiego, I. Sola, S. Zuñiga, J.L. Nieto-Torres, S. Marquez-  
261 Jurado, et al., Engineering a Replication-Competent, Propagation-Defective  
262 Middle East Respiratory Syndrome Coronavirus as a Vaccine Candidate,  
263 *mBio*. 4 (2013) 20282–11. doi:10.1128/mBio.00650-13.
- 264 [6] J. Netland, M.L. DeDiego, J. Zhao, C. Fett, E. Álvarez, J.L. Nieto-Torres, et  
265 al., Immunization with an attenuated severe acute respiratory syndrome  
266 coronavirus deleted in E protein protects against lethal respiratory disease,  
267 *Virology*. 399 (2010) 120–128. doi:10.1016/j.virol.2010.01.004.
- 268 [7] J.J.A. Armenteros, K.D. Tsirigos, C.K. Sønderby, T.N. Petersen, O. Winther,  
269 S. Brunak, et al., SignalP 5.0 improves signal peptide predictions using deep  
270 neural networks, *Nat. Biotechnol.* (2019) 1–8. doi:10.1038/s41587-019-0036-  
271 z.
- 272 [8] I. Mingarro, G. von Heijne, P. Whitley, Membrane-protein engineering, *Trends*  
273 *Biotechnol.* 15 (1997) 432–437. doi:10.1016/S0167-7799(97)01101-3.
- 274 [9] L. Martínez-Gil, A. Saurí, M.A. Marti-Renom, I. Mingarro, Membrane protein  
275 integration into the endoplasmic reticulum, *Febs J.* 278 (2011) 3846–3858.  
276 doi:10.1111/j.1742-4658.2011.08185.x.
- 277 [10] K. Braunger, S. Pfeffer, S. Shrimal, R. Gilmore, O. Berninghausen, E.C.  
278 Mandon, et al., Structural basis for coupling protein transport and N-  
279 glycosylation at the mammalian endoplasmic reticulum, *Science*. 360 (2018)  
280 215–219. doi:10.1126/science.aar7899.
- 281 [11] I.M. Nilsson, G. von Heijne, Determination of the distance between the  
282 oligosaccharyltransferase active site and the endoplasmic reticulum  
283 membrane, *J Biol Chem*. 268 (1993) 5798–5801.
- 284 [12] M. Orzáez, J. Salgado, A. Giménez-Giner, E. Pérez-Payá, I. Mingarro,  
285 Influence of proline residues in transmembrane helix packing, *J Mol Biol*. 335  
286 (2004) 631–640.
- 287 [13] E. Corse, C.E. Machamer, Infectious bronchitis virus E protein is targeted to  
288 the Golgi complex and directs release of virus-like particles, *J Virol*. 74 (2000)  
289 4319–4326. doi:10.1128/jvi.74.9.4319-4326.2000.
- 290 [14] M.J. Raamsman, J.K. Locker, A. de Hooge, A.A. de Vries, G. Griffiths, H.  
291 Vennema, et al., Characterization of the coronavirus mouse hepatitis virus  
292 strain A59 small membrane protein E, *J Virol*. 74 (2000) 2333–2342.  
293 doi:10.1128/jvi.74.5.2333-2342.2000.
- 294 [15] M. Godet, R. L'Haridon, J.F. Vautherot, H. Laude, TGEV corona virus ORF4  
295 encodes a membrane protein that is incorporated into virions, *Virology*. 188  
296 (1992) 666–675. doi:10.1016/0042-6822(92)90521-p.

- 297 [16] J. Maeda, J.F. Repass, A. Maeda, S. Makino, Membrane topology of  
298 coronavirus E protein, *Virology*. 281 (2001) 163–169.  
299 doi:10.1006/viro.2001.0818.
- 300 [17] Q. Yuan, Y. Liao, J. Torres, J.P. Tam, D.X. Liu, Biochemical evidence for the  
301 presence of mixed membrane topologies of the severe acute respiratory  
302 syndrome coronavirus envelope protein expressed in mammalian cells, *FEBS*  
303 *Lett.* 580 (2006) 3192–3200. doi:10.1016/j.febslet.2006.04.076.
- 304 [18] G. von Heijne, Control of topology and mode of assembly of a polytopic  
305 membrane protein by positively charged residues, *Nature*. 341 (1989) 456–  
306 458. doi:10.1038/341456a0.
- 307 [19] C. Baeza-Delgado, M.A. Marti-Renom, I. Mingarro, Structure-based statistical  
308 analysis of transmembrane helices, *Eur Biophys J.* 42 (2012) 199–207.  
309 doi:10.1007/s00249-012-0813-9.
- 310 [20] I. Nilsson, G. von Heijne, Fine-tuning the topology of a polytopic membrane  
311 protein: role of positively and negatively charged amino acids, *Cell*. 62 (1990)  
312 1135–1141.
- 313 [21] M. Bañó-Polo, F. Baldin, S. Tamborero, M.A. Marti-Renom, I. Mingarro, N-  
314 glycosylation efficiency is determined by the distance to the C-terminus and  
315 the amino acid preceding an Asn-Ser-Thr sequon, *Protein Sci.* 20 (2011)  
316 179–186. doi:10.1002/pro.551.
- 317 [22] A. Saurí, S. Tamborero, L. Martínez-Gil, A.E. Johnson, I. Mingarro, Viral  
318 membrane protein topology is dictated by multiple determinants in its  
319 sequence, *J Mol Biol.* 387 (2009) 113–128. doi:10.1016/j.jmb.2009.01.063.
- 320 [23] J.L. Nieto-Torres, M.L. DeDiego, E. Álvarez, J.M. Jimenez-Guardeño, J.A.  
321 Regla-Nava, M. Llorente, et al., Subcellular location and topology of severe  
322 acute respiratory syndrome coronavirus envelope protein, *Virology*. 415  
323 (2011) 69–82. doi:10.1016/j.virol.2011.03.029.
- 324 [24] C. Verdiá-Báguena, J.L. Nieto-Torres, A. Alcaraz, M.L. DeDiego, J. Torres,  
325 V.M. Aguilella, et al., Coronavirus E protein forms ion channels with  
326 functionally and structurally-involved membrane lipids, *Virology*. 432 (2012)  
327 485–494. doi:10.1016/j.virol.2012.07.005.
- 328 [25] W. Surya, Y. Li, J. Torres, Structural model of the SARS coronavirus E  
329 channel in LMPG micelles, *Biochimica Et Biophysica Acta (BBA) -*  
330 *Biomembranes*. 1860 (2018) 1309–1317.  
331 doi:10.1016/j.bbamem.2018.02.017.
- 332 [26] E. Corse, C.E. Machamer, The cytoplasmic tails of infectious bronchitis virus  
333 E and M proteins mediate their interaction, *Virology*. 312 (2003) 25–34.  
334 doi:10.1016/s0042-6822(03)00175-2.
- 335 [27] T. Hessa, N.M. Meindl-Beinker, A. Bernsel, H. Kim, Y. Sato, M. Lerch-Bader,  
336 et al., Molecular code for transmembrane-helix recognition by the Sec61  
337 translocon, *Nature*. 450 (2007) 1026–1030. doi:10.1038/nature06387.
- 338 [28] T. Hessa, H. Kim, K. Bihlmaier, C. Lundin, J. Boekel, H. Andersson, et al.,  
339 Recognition of transmembrane helices by the endoplasmic reticulum  
340 translocon, *Nature*. 433 (2005) 377–381. doi:10.1038/nature03216.
- 341 [29] A. Krogh, B. Larsson, G. von Heijne, E.L.L. Sonnhammer, Predicting  
342 transmembrane protein topology with a hidden markov model: application to  
343 complete genomes, *J Mol Biol.* 305 (2001) 567–580.  
344 doi:10.1006/jmbi.2000.4315.

- 345 [30] T. Nugent, D.T. Jones, Transmembrane protein topology prediction using  
346 support vector machines, *BMC Bioinformatics*. 10 (2009) 980–111.  
347 doi:10.1186/1471-2105-10-159.
- 348 [31] G.E. Tusnády, I. Simon, The HMMTOP transmembrane topology prediction  
349 server, *Bioinformatics*. 17 (2001) 849–850.  
350 doi:10.1093/bioinformatics/17.9.849.
- 351 [32] L. Käll, A. Krogh, E.L.L. Sonnhammer, A Combined Transmembrane  
352 Topology and Signal Peptide Prediction Method, *J Mol Biol*. 338 (2004) 1027–  
353 1036. doi:10.1016/j.jmb.2004.03.016.
- 354 [33] K.D. Tsirigos, C. Peters, N. Shu, L. Käll, A. Elofsson, The TOPCONS web  
355 server for consensus prediction of membrane protein topology and signal  
356 peptides, *Nucleic Acids Res*. 43 (2015) W401–W407.  
357 doi:10.1093/nar/gkv485.
- 358 [34] L. Martínez-Gil, A.E. Johnson, I. Mingarro, Membrane insertion and  
359 biogenesis of the Turnip Crinkle Virus p9 movement protein, *J Virol*. (2010).  
360 doi:10.1128/JVI.00125-10.
- 361 [35] S. Tamborero, M. Vilar, L. Martínez-Gil, A.E. Johnson, I. Mingarro, Membrane  
362 insertion and topology of the translocating chain-associating membrane  
363 protein (TRAM), *J Mol Biol*. 406 (2011) 571–582.  
364 doi:10.1016/j.jmb.2011.01.009.  
365

Figure 1

**A**

39 40 48 54 66

+ | + | + | + | + |

**SARS-COV-2** --MYSFVSEETGTLIVNS-VLLFLAFVFLVTLAILTALRLCAYCCNIVNVSLVKP**S**FYVY---SRVKNLN-**SSR**-VPDLLV--

SARS-COV --MYSFVSEETGTLIVNS-VLLFLAFVFLVTLAILTALRLCAYCCNIVNVSLVKP**T**VYVY---SRVKNLN-S**SE**VPDLLV--

MERS-COV --MLPFVQERIGLFIVNFFIF-TVVCAITLLVCMFLATATRLCVQCMTGFNTLLVQPALYLYNTGRSVYVKFQ-DSKPPLPDEWV

HCOV-HKU1 --MVDLFFNDTAWYIGQI-LVLVLFCLISLIFVVAFLATIK**LC**MQLCGFCNFFI**S**PSAYVYKRGMQLYKSYSEQVIPPTSDYLI-

HCOV-OC43 MF**M**ADAYLADT**V**WYV**G**QI-IFIVAICLLVTIVVVAFLAT**F**KL**C**IQLCGMCNTLVLS**P**SIYVFNRRGRQFYEFYN-DIKPPVLDVDDV

HCOV-229E --MFLKLVDHHA-LVNVN-LLWCVVLIIVLLVCITIIK**L**IK**L**CFTCHMFCNRTVYGP**I**KNVY---HIYQSYM-HIDPFKRVIDF

HCOV-NL63 --MFLRLIDDNG-IVLNS-ILWLLVMIFFFVLAMTF**I**KLIQ**L**CFTCHYFFSRTLYQP**V**YKIFLA---YQDYM-QIAPVPAEVLNV

**B**

| Virus name        | Uniprot code | Length (aa) | Similarity % |
|-------------------|--------------|-------------|--------------|
| <b>SARS-COV-2</b> | P0DTC4       | 75          | -            |
| SARS-COV          | P59637       | 76          | 94.74%       |
| MERS-COV          | K9N5R3       | 82          | 36.00%       |
| HCOV-HKU1         | Q0ZJ83       | 82          | 31.58%       |
| HCOV-OC43         | Q4VID3       | 84          | 31.15%       |
| HCOV-229E         | P19741       | 77          | 27.14%       |
| HCOV-NL63         | H9EJA2       | 77          | 18.46%       |

**C**

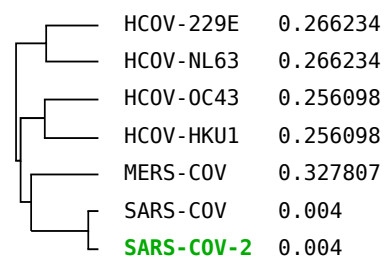

Figure 2

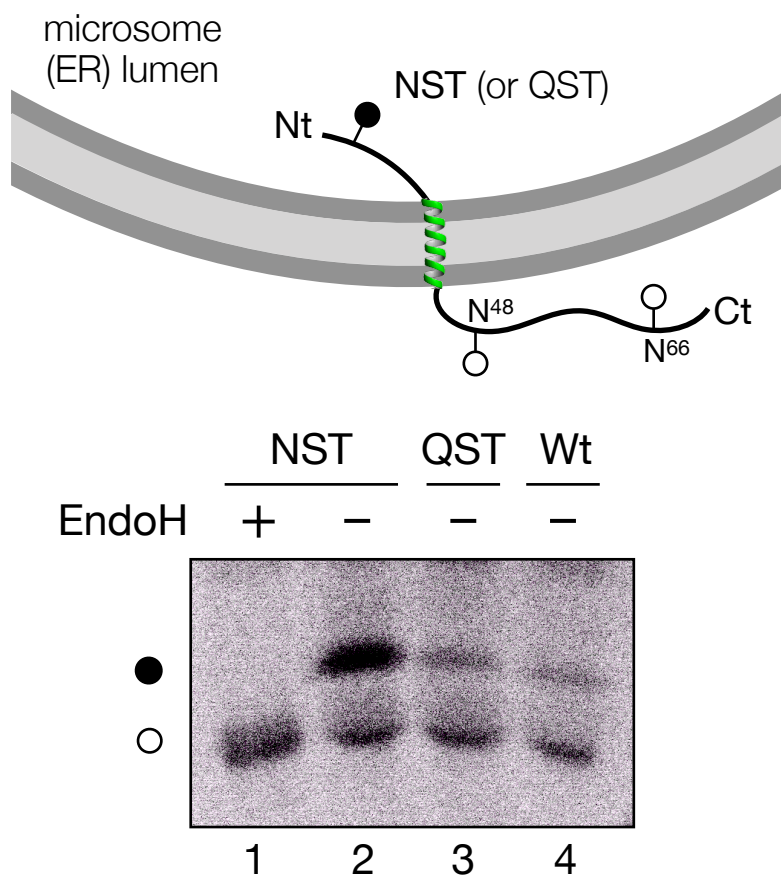



Figure 3

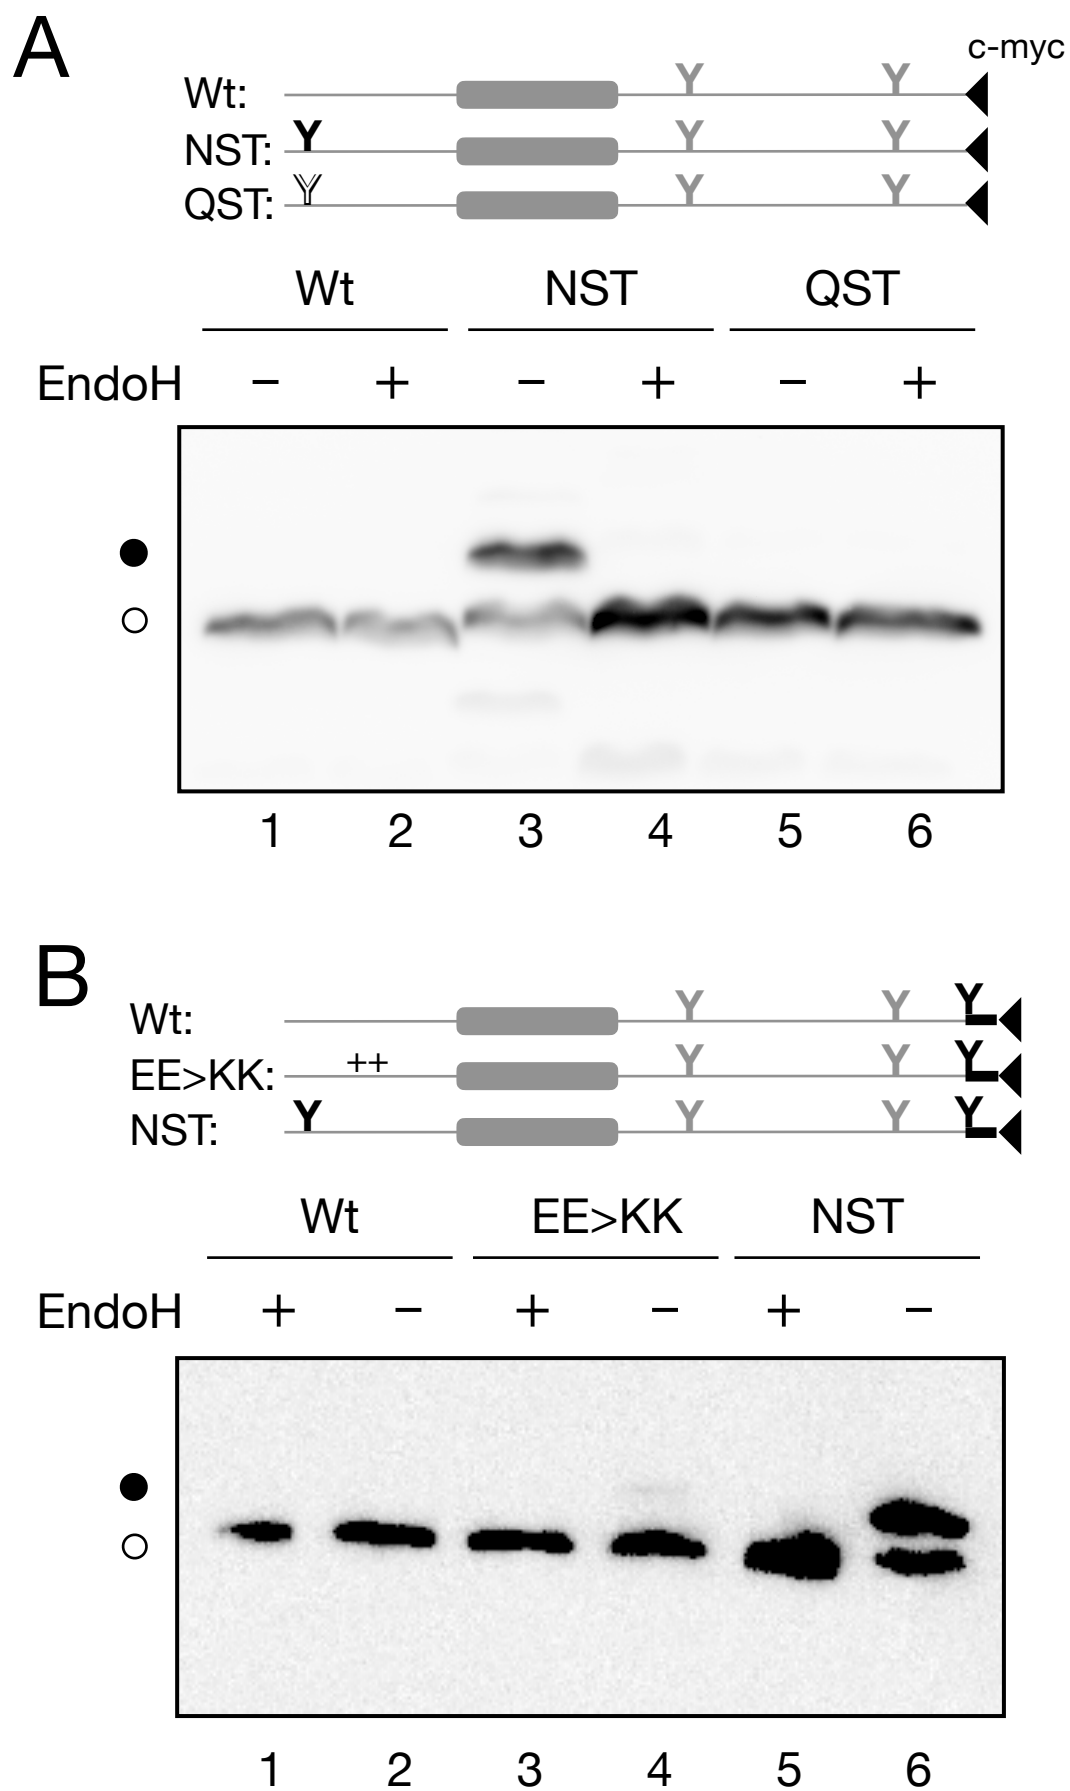

Source: https://www.biorxiv.org/content/10.1101/2020.05.27.118752v1.full.pdf
